# Supplementary material
Source: PubMed Central journal article supplement (PMC5803789)
Supplement: chen_bor_supplemental_data.pdf [file chen_bor_supplemental_data.pdf]

## Supplemental Figures and Table

Figure S1. Germ cell marker expression and optimization of PGCLC induction from hESCs.

Figure S2. Generating ITGA6/EPCAM//TNAP/cKIT positive PGCLCs.

Figure S3. PGCLC induction from 18 pluripotent hESC lines derived at UCLA.

Figure S4. Evaluation of *T* and *EOMES* in different combination of cytokines and inhibitors and molecular information of *EOMES* mutant alleles.

Supplemental Table S1. List of antibodies used in this study

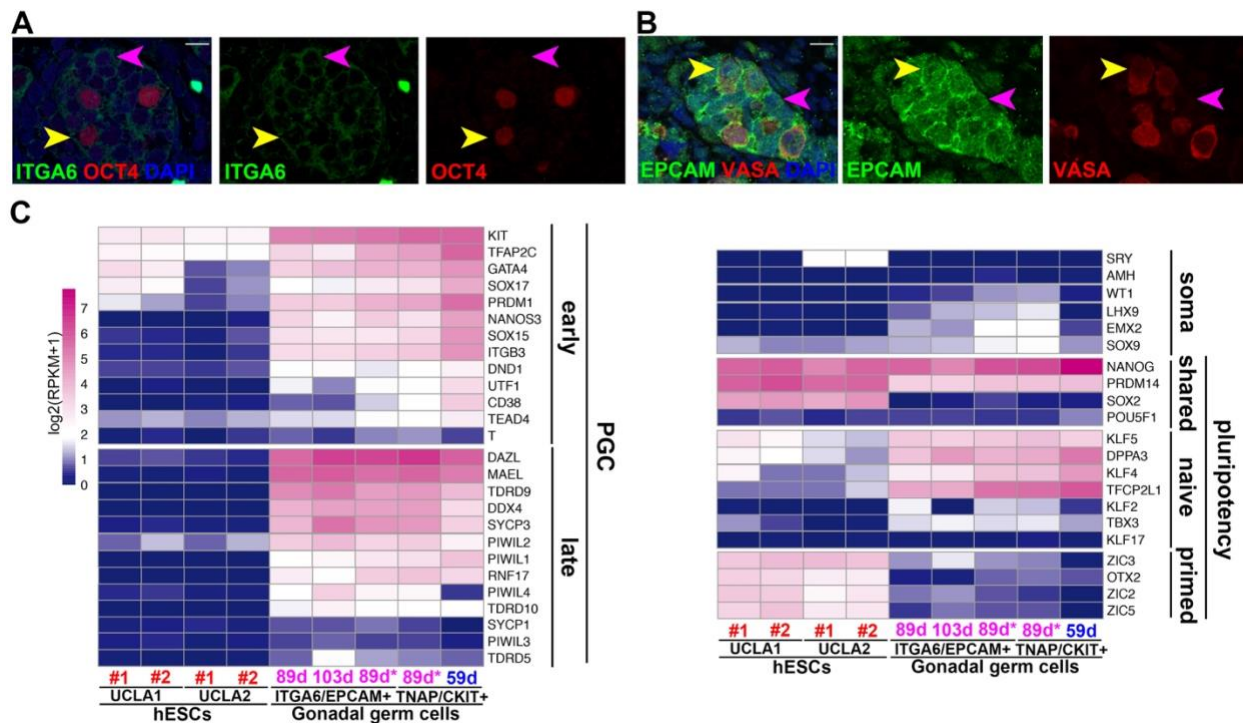

**Figure S1. Germ cell marker expression and optimization of PGCLC induction from hESCs.**

(A) Human embryonic testis at day (d) 115 section stained with ITGA6 (green), OCT4 (red), and DAPI (blue) by immunofluorescence. Yellow arrowhead points to a OCT4-positive germ cell that is also positive for ITGA6. Purple arrowhead points to a ITGA6-positive germ cell that is negative for OCT4. Scale bar: 10 $\mu$ m.

(B) Human embryonic testis at day (d) 72 section stained with EPCAM (green), VASA (red) and DAPI (blue) by immunofluorescence. Yellow arrowhead points to a VASA-positive germ cell that is also positive for EPCAM. Purple arrowhead points to a EPCAM-positive germ cell that is negative for VASA. Scale bar: 10 $\mu$ m.

(C) Heat map showing the expression of germ cell, somatic cell and pluripotency genes in transcriptomes shown in Figure 1E.

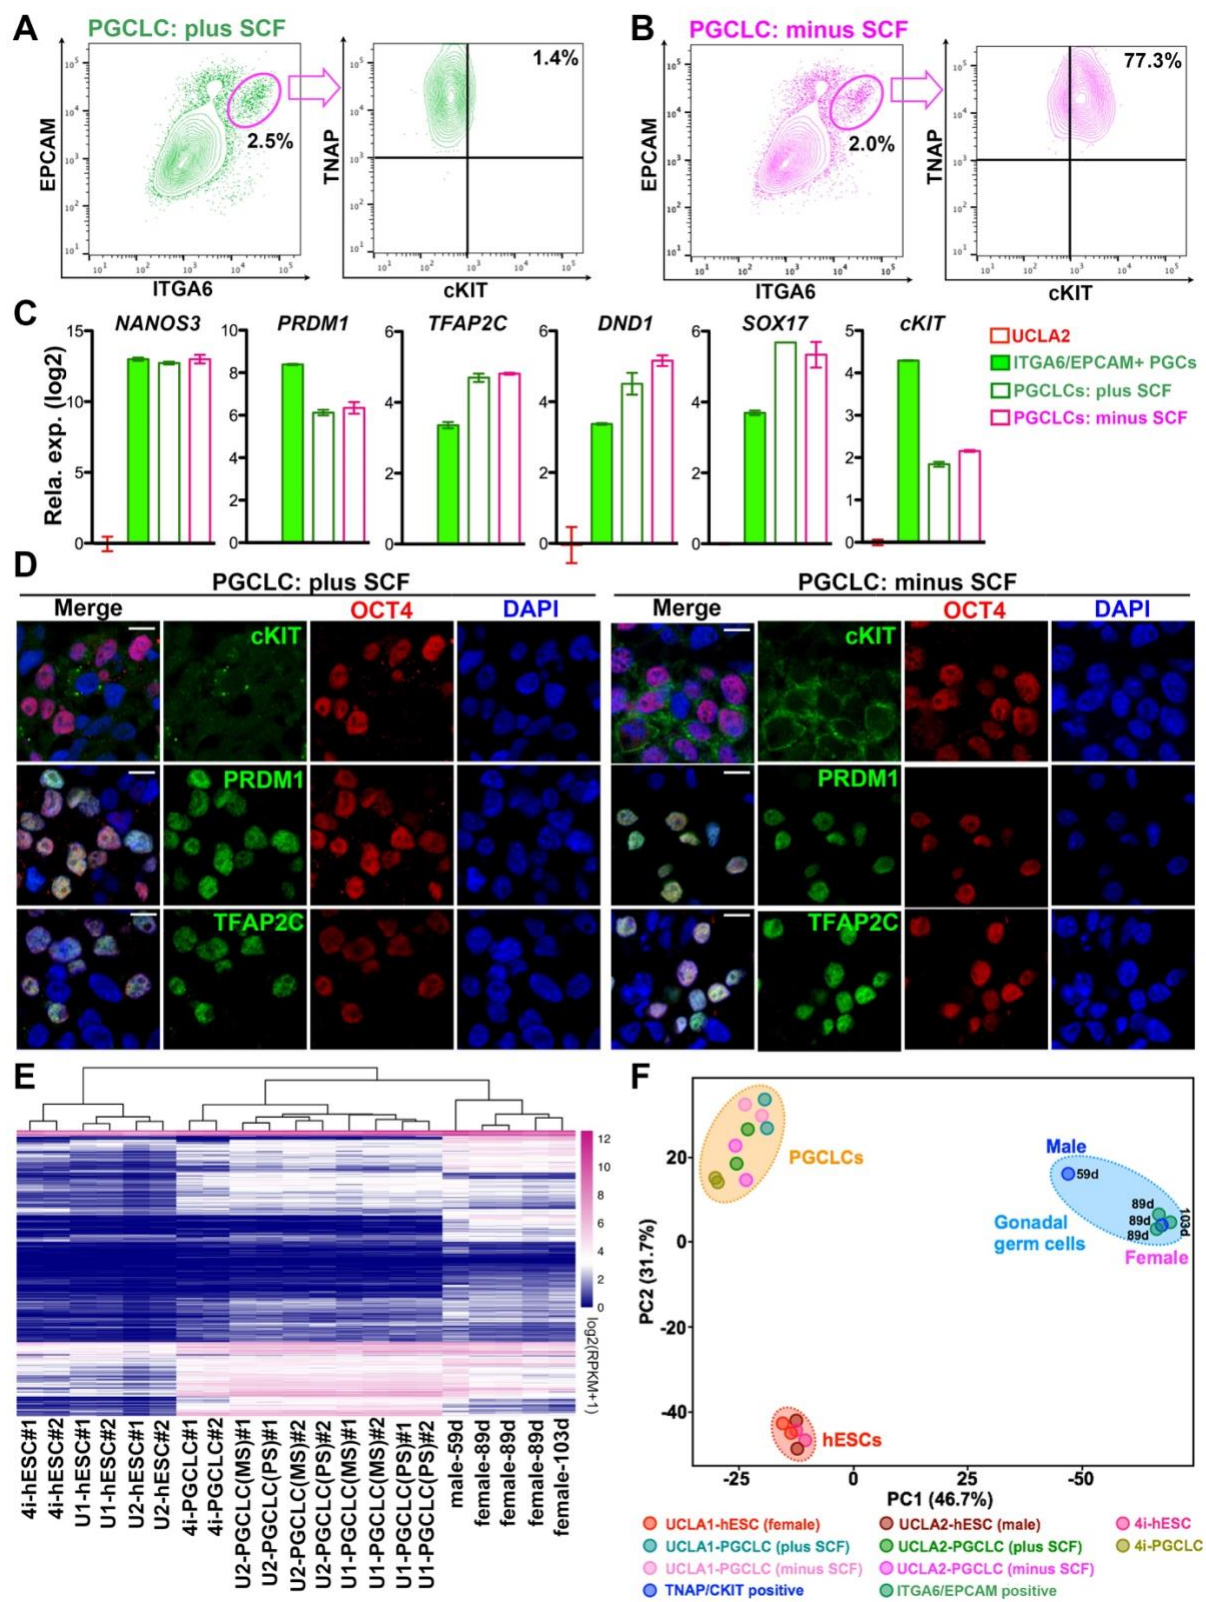

Figure S2. Generating ITGA6/EPCAM//TNAP/cKIT positive PGCLCs.

(A-B): Flow cytometry of day 4 aggregates made with SCF (A) or without SCF (B) from UCLA2 (p13) and stained for ITGA6/EPCAM/TNAP/cKIT.

(C) Real time PCR of the sorted ITGA6/EPCAM positive PGCLCs made from UCLA2 (p13, p14) with SCF (green open columns) or without SCF (purple open columns) and compared to gene expression in ITGA6/EPCAM PGCs at day 72 post-fertilization (Figure 1A-B) (green solid columns). Fold change is calculated relative to expression levels of each gene in the UCLA1 hESC line, which was given a value of 1.0.

(D) Immunofluorescence of day 4 PGCLC aggregates from UCLA2 (p14) to examine co-localization of OCT4 (red), with cKIT, PRDM1 and TFAP2C (all green). Scale bar: 10 $\mu$ m.

(E) UHC of primed undifferentiated hESCs (UCLA1 p14, p15 and UCLA2 p13, p14), day 4 PGCLCs sorted by FACS using ITGA6/EPCAM (made from UCLA1 p14, p15 and UCLA2 p13, p14) with (plus) and without (minus) SCF, undifferentiated 4i cultured hESCs sorted with TNAP (WIS2) and day 4 PGCLCs sorted by FACS using TNAP/NANOS3-mCherry (made from WIS2). UHC was based on the expression of DEGs between hPGCs and H9 hESCs defined by Irie et al., 2015 and Sasaki et al., 2015. U1 and U2 indicate UCLA1 and UCLA2, respectively. Gonadal germ cell libraries analyzed here are the same in Figure 1E. MS = minus SCF. PS = plus SCF.

(F) PCA of transcriptomes in (E).

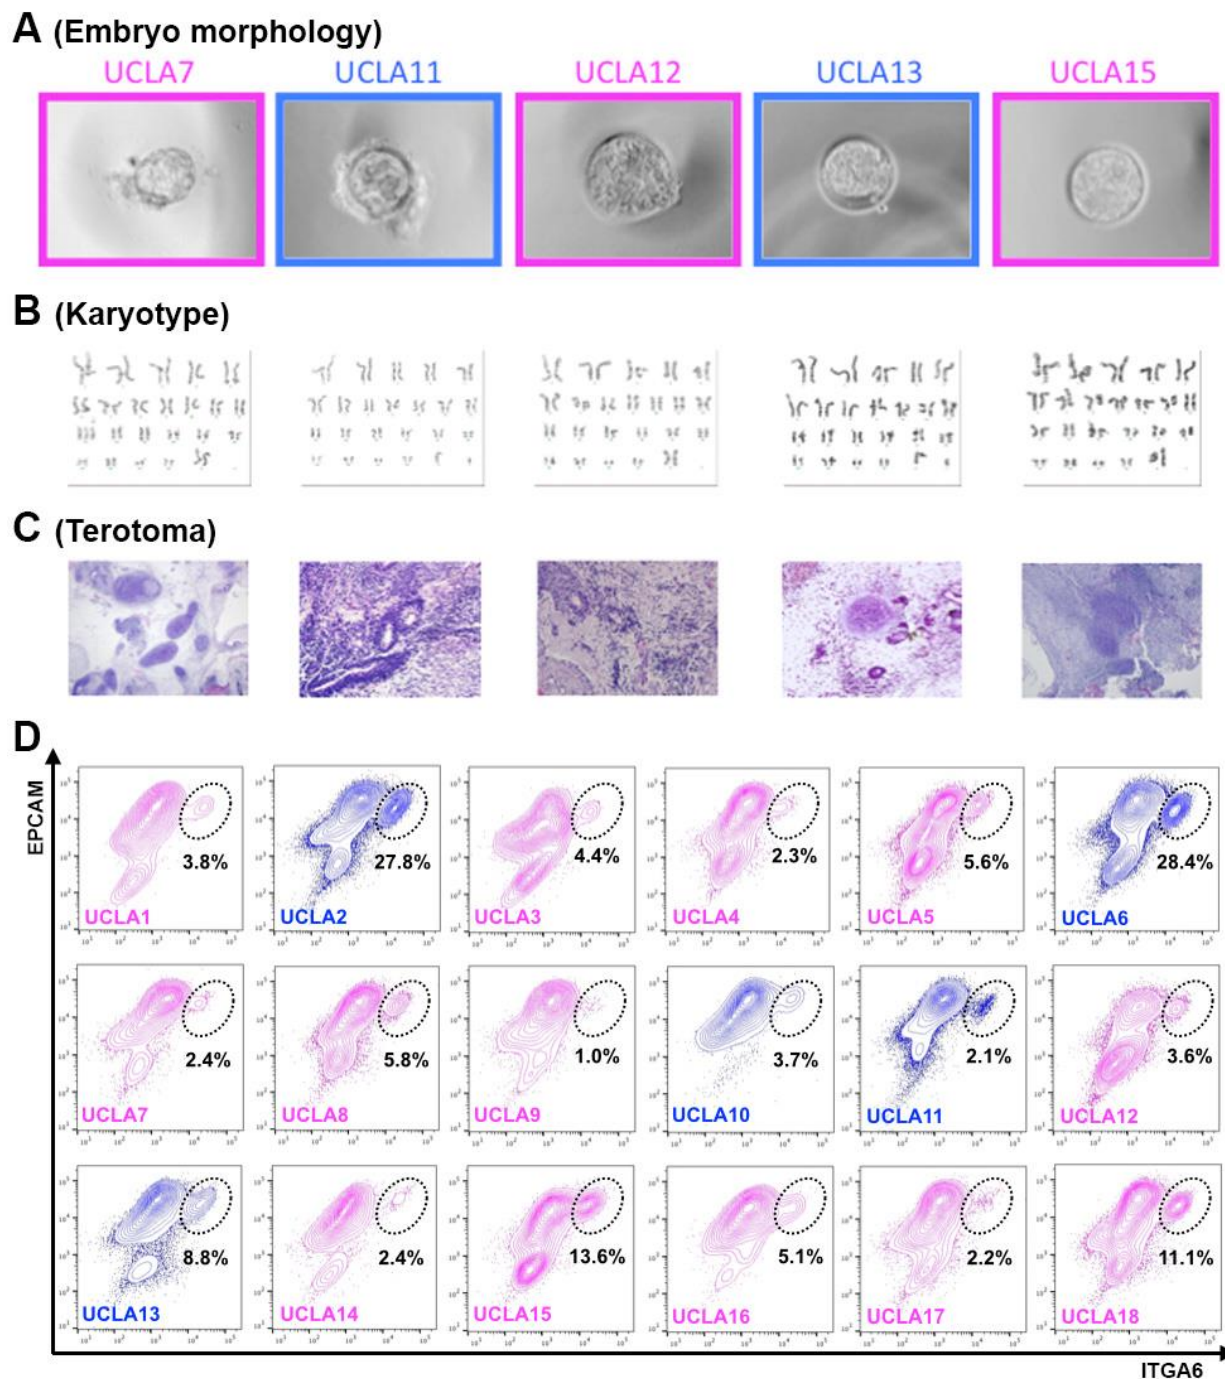

**Figure S3. PGCLC induction from 18 pluripotent hESC lines derived at UCLA.**

(A) Morphology of human embryos used for derivation of hESC lines UCLA7, UCLA11, UCLA12, UCLA13, and UCLA15. All other hESC lines are reported elsewhere.

(B) Karyotypes of hESC lines UCLA7, UCLA11, UCLA12, UCLA13, and UCLA15 (from left to

right). All other hESC lines are reported elsewhere.

(C) Representative images showing teratomas formed by injection of hESC lines UCLA7, UCLA11, UCLA12, UCLA13, and UCLA15 (from left to right) into the testes of SCID-beige mice. All other hESC lines are reported elsewhere.

(D) FACS plots of day 4 PGCLCs (sorted with ITGA6/EPCAM) induced from 18 hESC lines through 24 hours of iMeLC differentiation.

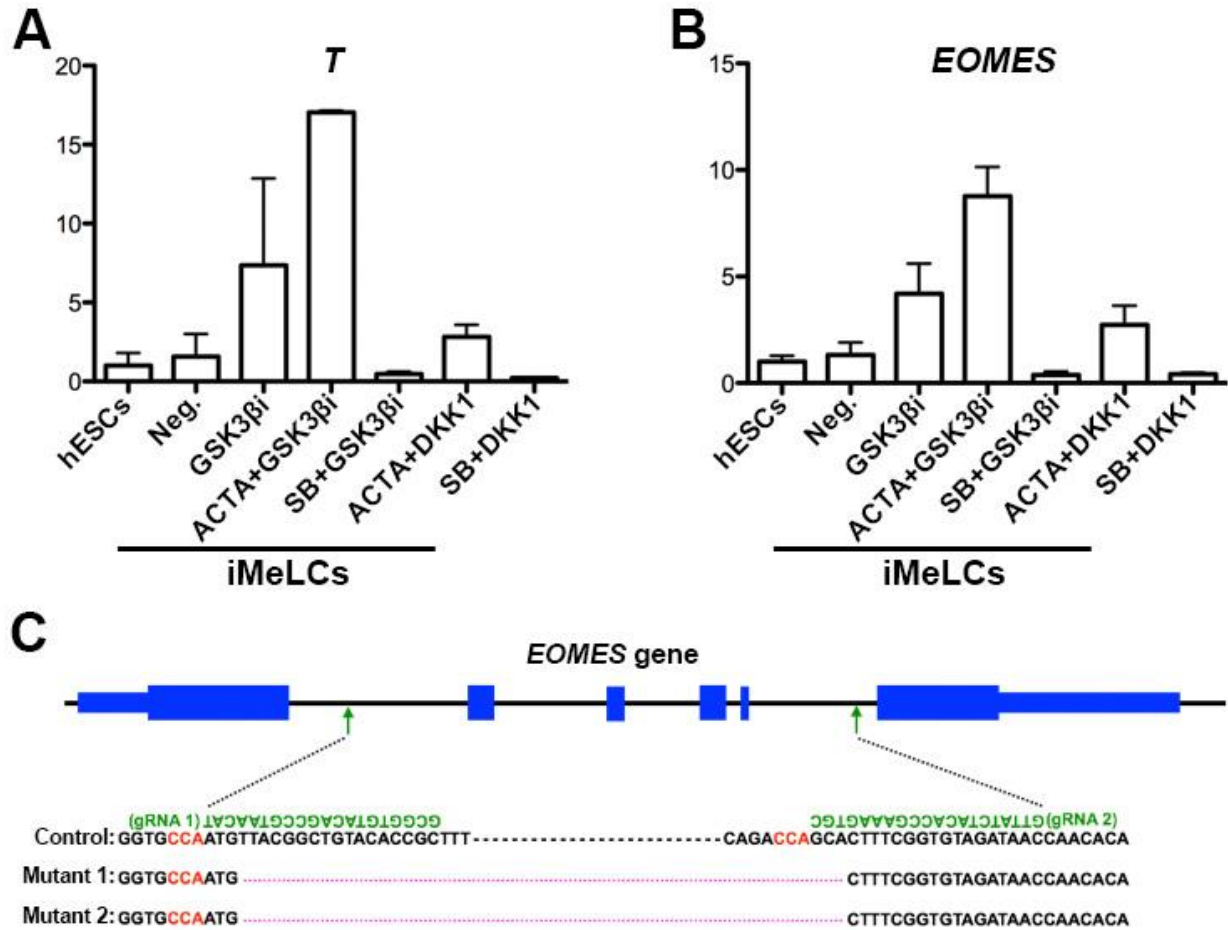

**Figure S4. Evaluation of *T* and *EOMES* in different combination of cytokines and inhibitors and molecular information of *EOMES* mutant alleles.**

(A) *T* expression in the iMeLCs with different combinations of cytokines and signaling inhibitors.

(B) *EOMES* expression in the iMeLCs with different combinations of cytokines and signaling inhibitors.

(C) Molecular information of gRNAs for targeting *EOMES* and the resulting *EOMES* mutant alleles in the subline used in this study.

**Supplemental Table S1**

List of antibodies used in this study

| Name                               | Catalog number                         | Purpose            | Dilution |
|------------------------------------|----------------------------------------|--------------------|----------|
| BV421 anti-human/mouse ITGA6       | BioLegend Cat# 313624                  | FACS               | 1:60     |
| 488 anti-human EPCAM               | BioLegend Cat# 324210                  | FACS               | 1:60     |
| APC anti-human EPCAM               | BioLegend Cat# 324208                  | FACS               | 1:60     |
| PE anti-human TNAP                 | BD Pharmingen Cat# 561433              | FACS               | 1:60     |
| APC anti-human cKIT                | BD Pharmingen Cat# 550412              | FACS               | 1:60     |
| Rabbit anti-human EPCAM            | Abcam Cat# ab71916,                    | Immunofluorescence | 1:50     |
| Goat anti-human VASA               | R&D Systems, Cat# AF2030               | Immunofluorescence | 1:20     |
| Rabbit anti-human cKIT             | DAKO Cat# A4502                        | Immunofluorescence | 1:100    |
| Goat anti-human OCT4               | Santa Cruz Biotechnology Cat# sc-8628x | Immunofluorescence | 1:100    |
| Rabbit anti-human PRDM1            | Cell Signaling Technology Cat# 9115    | Immunofluorescence | 1:100    |
| Mouse anti-human PRDM1             | R&D Systems Cat# MAB36081SP            | Immunofluorescence | 1:100    |
| Rabbit anti-human TFAP2C           | Santa Cruz Biotechnology Cat# sc-8977  | Immunofluorescence | 1:100    |
| Mouse anti-human TFAP2C            | Santa Cruz Biotechnology Cat# sc12762  | Immunofluorescence | 1:100    |
| Rat anti-human ITGA6               | Santa Cruz Biotechnology Cat# sc-80554 | Immunofluorescence | 1:100    |
| Goat anti-human T                  | R&D Systems Cat# AF2085                | Immunofluorescence | 1:100    |
| Goat anti-human SOX17              | Neuromics Cat# GT15094                 | Immunofluorescence | 1:100    |
| Rabbit anti-mouse EOMES            | Abcam Cat# ab23345                     | Immunofluorescence | 1:100    |
| Rabbit anti-human $\beta$ -CATENIN | Cell Signaling Technology Cat# 9582    | Immunofluorescence | 1:100    |
| Rabbit anti-human pSMAD2/3         | Cell Signaling Technology Cat# 8828    | Immunofluorescence | 1:100    |
